# Supplementary material for: Ectomycorrhizal Community Shifts at a Former Uranium Mining Site
Source: MDPI journal article supplement (doi:10.3390/jof9040483), 2023-04-18
Supplement: s1 [file s1]

## Supplementary Materials

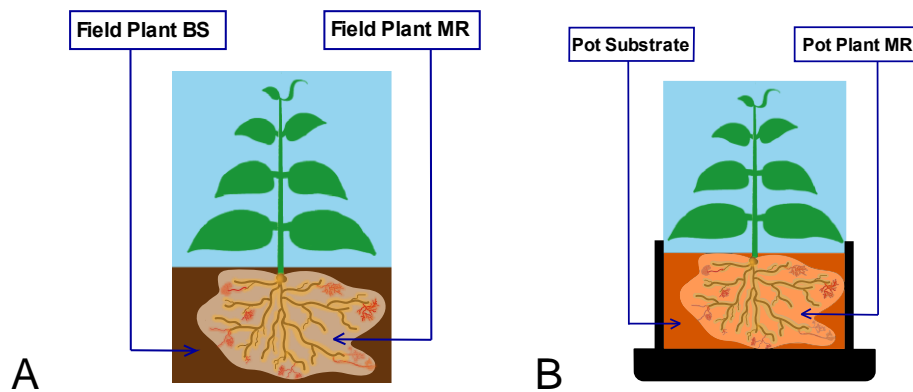

**Figure S1.** Schemes of soil sampling. A, at the test field; B, from pots. MR, mycorrhizosphere; BS, bulk soil.

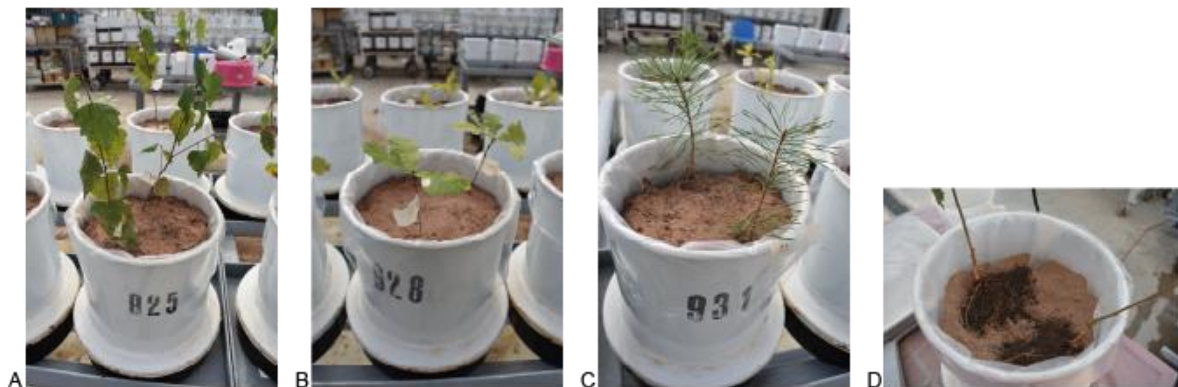

**Figure S2.** Images of pot variants. A, pot birches; B, pot oaks; C, pot pines; D, the process of inoculation of plants with the ectomycorrhizal fungi.

**Table S1.** Overview of pot experiment variants.

| Non-inoculated variants |           |           |           | Inoculated variants |           |           |           |
|-------------------------|-----------|-----------|-----------|---------------------|-----------|-----------|-----------|
| control                 | birch     | oak       | pine      | control             | birch     | oak       | pine      |
| 3 pots                  | 6 pots    | 6 pots    | 5 pots    | 3 pots              | 7 pots    | 7 pots    | 5 pots    |
| -                       | 12 plants | 12 plants | 10 plants | -                   | 14 plants | 14 plants | 10 plants |

**Table S2.** Characteristics of exploration types of mycorrhiza according to Agerer [13].

| Exploration type                      | Hyphal mantle   | Emanating hyphae | Rhizomorphs                                                           | Hydrophobicity | Contact with a substrate                                       |
|---------------------------------------|-----------------|------------------|-----------------------------------------------------------------------|----------------|----------------------------------------------------------------|
| <i>Contact</i>                        | Smooth          | Rare             | No                                                                    | Hydrophilic    | Close contact with a substrate via mantle                      |
| <i>Short distance</i>                 | Different types | Voluminous       | No                                                                    | Hydrophilic    | Close contact with a substrate via mantle and emanating hyphae |
| <i>Medium distance fringe subtype</i> | Different types | Voluminous       | Fans of ramified and repeatedly interconnected rhizomorphs            | Hydrophilic    | Extended contact with the soil through rhizomorphs             |
| <i>Medium distance mat subtype</i>    | Different types | Presented        | Mats of densely packed undifferentiated rhizomorphs                   | Hydrophobic    | Extended contact with the soil through rhizomorphs             |
| <i>Medium distance smooth subtype</i> | Smooth          | Rare             | Rhizomorphs un- or slightly differentiated with a thick central hypha | Hydrophobic    | Extended contact with the soil through rhizomorphs             |
| <i>Long-distance</i>                  | Smooth          | Presented        | Rare but highly differentiated                                        | Hydrophobic    | Long distribution in the soil                                  |

**Table S3.** Morphological description of morphotypes.

| Host  | Variant                  | Morphotype     | Morphology                                                                                               | Emanating hyphae        | Rhizomorphs                                                                                      | Exploration type       |
|-------|--------------------------|----------------|----------------------------------------------------------------------------------------------------------|-------------------------|--------------------------------------------------------------------------------------------------|------------------------|
| Birch | Field plant              | B_F_MT1        | unramified/monopodial pinnate, straight unramified ends, smooth mantle, light brown to dark brown colour | lacking                 | no                                                                                               | contact                |
|       |                          | B_F_MT2        | unramified, straight unramified ends, woolly mantle, black colour                                        | frequent, black         | no                                                                                               | short                  |
|       |                          | B_F_MT3        | unramified/monopodial pinnate, straight unramified ends, smooth mantle, beige colour with silver dots    | lacking                 | no                                                                                               | contact                |
|       | Pot non-inoculated plant | B_non_inoc_MT1 | unramified, straight unramified ends, smooth mantle, light brown colour                                  | lacking                 | no                                                                                               | contact                |
|       |                          | B_non_inoc_MT2 | unramified, straight unramified ends, woolly mantle, black colour                                        | frequent, black         | no                                                                                               | short                  |
|       |                          | B_non_inoc_MT3 | unramified, straight unramified ends, woolly mantle, light brown colour with silver dots                 | frequent, white         | no                                                                                               | short                  |
|       |                          | B_non_inoc_MT4 | unramified, straight unramified ends, woolly mantle, black colour, brown tips                            | frequent, black         | no                                                                                               | short                  |
|       |                          | B_non_inoc_MT5 | unramified, straight/bent unramified ends, grainy mantle, dark brown colour                              | infrequent, white/beige | no                                                                                               | short                  |
|       | Pot inoculated plant     | B_inoc_MT1     | unramified, straight unramified ends, smooth mantle, light brown to beige colour                         | lacking                 | no                                                                                               | contact                |
|       |                          | B_inoc_MT2     | unramified, straight unramified ends, woolly mantle, black colour                                        | frequent, black         | no                                                                                               | short                  |
|       |                          | B_inoc_MT3     | unramified/monopodial pinnate, straight unramified ends, smooth mantle, dark brown colour                | lacking                 | no                                                                                               | contact                |
| Oak   | Field plant              | O_F_MT1        | unramified, straight unramified ends, woolly mantle, black colour                                        | frequent, black         | no                                                                                               | short                  |
|       |                          | O_F_MT2        | unramified, straight unramified ends, smooth mantle, light brown colour                                  | lacking                 | no                                                                                               | contact                |
|       |                          | O_F_MT3        | unramified, straight unramified end, grainy mantle, dark brown to black colour                           | infrequent, white       | no                                                                                               | contact                |
|       |                          | O_F_MT4        | unramified/irregular pinnate/dichotomous-like, tortuous unramified ends, stringy mantle, brown colour    | abundant, white         | yes, with restricted points of connection with mantle and interconnected filaments, white colour | medium, fringe subtype |
|       | Pot non-inoculated plant | O_non_inoc_MT1 | unramified, straight unramified ends, woolly mantle, black colour                                        | infrequent, black       | no                                                                                               | short                  |
|       |                          | O_non_inoc_MT2 | unramified, straight unramified ends, smooth mantle, light brown colour                                  | lacking                 | no                                                                                               | contact                |
|       |                          | O_non_inoc_MT3 | unramified, straight unramified ends, woolly mantle, silver colour, light brown tips                     | infrequent, white       | restricted points of connection with mantle, unsheathed, white colour                            | medium, smooth subtype |
|       |                          | O_inoc_MT1     | unramified, straight unramified ends, smooth/grainy mantle, beige colour                                 | lacking                 | no                                                                                               | contact                |
|       |                          | O_inoc_MT2     | unramified, straight unramified ends, woolly mantle, black colour                                        | abundant, black         | no                                                                                               | short                  |

| Host | Variant                  | Morphotype     | Morphology                                                                                   | Emanating hyphae  | Rhizomorphs                                                                   | Exploration type       |
|------|--------------------------|----------------|----------------------------------------------------------------------------------------------|-------------------|-------------------------------------------------------------------------------|------------------------|
|      |                          | O_inoc_MT3     | unramified/dichotomous, straight unramified ends, woolly mantle, white to grey colour        | infrequent, white | no                                                                            | short                  |
| Pine | Field plant              | P_F_MT1        | unramified/dichotomous, straight unramified ends, reticulate mantle, light brown colour      | lacking           | no                                                                            | contact                |
|      |                          | P_F_MT2        | unramified, straight unramified ends, woolly mantle, black colour                            | abundant, black   | no                                                                            | short                  |
|      |                          | P_F_MT3        | coralloid, straight unramified ends, reticulate mantle, white colour                         | lacking           | yes, restricted points of connection with mantle, hairy, white-pinkish colour | medium, fringe subtype |
|      |                          | P_F_MT4        | dichotomous, straight unramified ends, woolly mantle, brown colour                           | abundant, white   | yes, hyphal fans, interconnected filaments, white colour                      | medium, mat subtype    |
|      | Pot non-inoculated plant | P_non_inoc_MT1 | unramified/dichotomous, straight unramified ends, smooth mantle, light brown to beige colour | lacking           | no                                                                            | contact                |
|      |                          | P_non_inoc_MT2 | unramified/dichotomous, straight unramified ends, smooth mantle, white to grey colour        | lacking           | no                                                                            | contact                |
|      |                          | P_non_inoc_MT3 | unramified, straight unramified ends, woolly mantle, dark brown to black colour              | abundant, black   | no                                                                            | short                  |
|      |                          | P_non_inoc_MT4 | unramified/dichotomous, straight unramified ends, woolly/grainy mantle, light beige colour   | frequent, white   | yes, growing off in flat angles, interconnected filaments, yellow colour      | long                   |
|      | Pot inoculated plant     | P_inoc_MT1     | unramified/dichotomous, straight unramified ends, smooth mantle, light brown to beige colour | lacking           | no                                                                            | contact                |
|      |                          | P_inoc_MT2     | unramified, straight unramified ends, woolly mantle, black colour, brown tips                | abundant, black   | no                                                                            | short                  |
|      |                          | P_inoc_MT3     | unramified, straight unramified ends, woolly/grainy mantle, beige colour with silver dots    | infrequent, white | no                                                                            | short                  |
|      |                          | P_inoc_MT4     | unramified, bent unramified ends, woolly mantle, silver colour                               | infrequent, white | no                                                                            | short                  |

>B\_F\_MT1-ITS-1

gCACGCcagGGCGTGTCTCTCACATAAAATCCATCTCACCCCTTTTGTGCACCACCGCGTGGGCACCCTTCGGGATCGAAC  
AGATCCAGGAGGGGGCTTGCCTTTTACACACAAACCCCTTTTAAAAGTGTAGAATGACCCCACTTTTGCATAACACGCAA  
TCAATACAACCTTTCAACAACGGATCTCTTGGCTCTCGCATCGATGAAGAACGCAGCGAAATGCGATACGTAATGTGAATTG  
CAGAAATTCAGTGAATCATCGAATCTTTGAACGCACCTTGCGCCCTTGGTATTCCGAGGGGCACACCCGTTTGAGTGTCTG  
GAAAATCTCAACCTTCTCGGTTTCTTCTGAACACCCGAAGGAGGCTTGGACTTTGGAGGCCTTTGCTGGCGTCTCTCACCAG  
CTCCTCTCAAACGAATTAGCGGGTCTCTTTGCCGATCCTCGACATGTGATAAGATGTTTCCATGTCTTGGCTTTATGGCT  
CTGTTGCCCTTTGGGACCCGCTTCTAACCGTCTCAGCGAGACAACGTTGAGCGTGTCTCCCTCTCGGGGAAACGCTCTT  
GAACCCACGAAACCTTGACCTCAAATCGGGTGAGAcTACCCGCTGAACCTTAAGCATATCAATAAGCGgAGGAaaa

>B\_F\_MT2-ITS-1

tGGgTTCtATTCCaAAACCGtGTATACATACCTTTGTTGCTTTGGCaGGCCGCTCTTAAGCGTGGCTCCGGCTGACTGCGC  
CTGCCAGAGAACCCaAACTCGTTTGTAGTGTGTCTGAGTACTATATAATAGTTAAAACCTTTCAACAACGGATCTCTTGGT  
TCTGGCATCgATGAAGAACGCAGCGAAATGCGATAAGTAATGTGAATTGAGAATTCAGTGAATCATCgAATCTTTGAACGC  
ACATTGCGCCCTTGGTATTCCGAGGGGCATGCCTGTTTCGAGCGTCATTATAACCACTCAAGCCTcGgCTTGGTCTTGGGG  
TTCGCGGTCTCGCGGCCCTTAAATCAGTGGCGGTGCCGTCTGGCTCTAAgCGTAGTAATTCTCTCGCTATAGGGTCCCG  
GCGGTCACCTGtCgAaACCCCCCATTTTTTACGGtTGACCTcGgAtCAGGtagGgataCCcgctgAacTtaAGCATATCAataaGcgGA  
ggA

>B\_F\_MT3-ITS-1

tCaGGTTGTTGGCTGGCTCCCTGAGCATGTGCACACTTGTCTATCTTTACTTTTCCCAATGTGCACATATTGTAGGCTTGGAG  
CTCTTTTGATTATCTTGATAGATTGAGGACTGCTGTGCTTCAGCCAGCTTTTCTTGTGTTTCCAGGTCTATGTTTACCTTC  
ACAAACTCTGAATATGTTTAGAATGTTGAAATATAATATATATACAACCTTCAGCAACGGATCTCTTGGCTCTCGCATCGA  
TGAAGAACGCAGCGAAATGCGATAAGTAATGTGAATTGCAGAATTCAGTGAATCATCGAATCTTTGAACGCATCTTGCGCT  
CCTTGGTATTCCGAGGAGCATGCCTGTTGAGTGTCAATCTCTCAACCACACCAATCTTTTGGCTTGGTGTGGCTTTT  
GGATCTGGGGGTTTTATTTTCTGCTCGCTGCTATTAAATGAGGTCAGCTCCCTGAAACTTATTAGCGGTATCTGAGCAGAGA  
GACCTACTACAGGTGTGATAAATTATCTATGCCTTGGTCATACTGCATGAACAGATTGTGCTGCTTCCAGTGAATCATTTGA  
CAATTTTGACCTCAAATCAGGTAGGACTACCCGCTGAACTTAAGCATATCAATAAGCGGAGGAa

>O\_F\_MT1-ITS-1

aacGGGTTCTATTCCccaACCGTGTaTACATACCTTTGTTGCTTTGGCAGGCCGCCTTTTAGGCGTCGGCTTCGGCTGACTG  
CGCCTGCCAGAGGACCCAAACTCGTTTGTTAATGATGTCTGAGTACTATATAATAGTTAAACCTTTCAACAACGGATCTCT  
TGGTTCTGGCATCgATGAAGAACGCAGCGAAATGCGATAAgTAATGTGAATTGCAaAATTCAGTGAATCATCgAATCTTTGAA  
CgCaATTGCGCCCTTGGTATCCGAGGGGCATGcCTGTTCaAgcgtCATTATaACCACTCAAGCCTGgCTTGGTCTTGgggtt  
CgCGGtCTCgCgtctTTAAATCagtGGCGGTGCCGtCTGGcTCTAAgCgTAgtAATTCTCtCgcTATAGGGtCCCGGcGGTTGCCT  
GCCagAACCCccCATTTTTTAcggtTGACCTCGgATcagGtAgGGATACcCGCTGAaCTTaagcatAtcAa

>O\_F\_MT3-ITS-1

GaatGGgtTCTATTCCcaAACCGTGTATACaTACCTTTGTTGCTTTGGCAGGCCGCCTTTTAGGCGTCGGCTCCGGCTGACTG  
CGCCTGCCAGAGGACCCAAACTCGTTTGTTAGTGATGTCTGAGTACTATATAATAGTTAAACCTTTCAACAACGGATCTCT  
TGGTTCTGGCATCGATGAAGAACGCAGCGAAATGCGATAAGTAATGTGAATTGCAGaAATTCAGTGAATCATCgAATCTTTGA  
ACGCACATTGCCCCCTTGGTATTCCGAGGGGCATGCCTGTTCaAgCGTCATTATAACCACTCAAGCCTCgGCTTGgTCTTG  
gggttCGCGGTCCCGCGGCTTAAATCagTGGCGGTGCCGtCTGGcTCTAAgCgtActAaTTctctgctATGGGGtCcCGGCGGtTg  
cctGccagAACcccccatTTttacgg

>O\_F\_TM4-ITS-1

tGatGGgTTGtTgTGGTTCTCTAGGGAGCATGTGCACGCCCTTGTCTATCTTTATATCTCCACCTGTGCACCTTTTGTAGACCTT  
CCAGGTCTATGTTGCTTCATTTACCCCAATGTATGTTAATAGAATGTTGTGCCTACAAAATACATACAACCTTTAGCAACGGA  
TCTCTTGGCTCTCGCATCGATGAAGAACGCAGCGAAATGCGATAAGTAATGTGAATTGCAGaAATTCAGTGAATCATCGAATC  
TTTGAACGCACCTTGGCTCCTTGGTATTccgAgGAGCATGCCTGTTGAgTGTCTTAATATATATCAACCTCTCTCTTGTG  
GAGtGgttGgATgtgggggtTtgTatgtaTTTTGTAAcACAACATTCTattAacaTACaTTGGGGTaaaTgaagcaaCATAgAcctGGAAGtGC  
tacaAaAgGTGCACAGTggAgatataaAGATgAcaagGcgTGcacaTg

>P\_F\_MT1-ITS-1

aTggaaAaaCGGGGTTGTTGCTGGCCTCCAatgGGGGCACGTGCACGcTCTGTTTACACATCCACTCACACCTGTGCACCCTC  
TGATGCTTATGTTGCTTCGGAAGACCCCGTCTTCTTCTGTAGCTCTACGCTTTACACACACACTGTAGCGATGTCTCATGGA  
ATGTTTTTATGCGTTTAAACGCGATACAATAACAACCTTCAGCAACGGATCTCTTGGCTCTCGCATCGATGAAGAACGCAGCGA  
AATGCGATAAGTAATGTGAATTGCAGAATTCAGTGAATCATCGAATCTTTGAACGCACCTTGGCGCCCTTGGTTATTCCCTTG  
GAGCATGCCTGTTTGAATCATGAACACCTCAACTCTCATGGTCTTCCATGATGAGCTTGGACTTTGGGGGTTTGGCTGGC  
CCTGCGGCGGCTCCTCTCAAATGAATCAGCTTGCCAGTGTGTTGGTGCCATCATGGGTGTGATCACTATCTACGCTCGCG  
GTCgTCTGCCAGGTAACCCTCAGCGATGAGGGTTCATTGGAGCTCATAAACGTCTCTCCTCGGCGAGGACAACCTTTTGAAC  
GTTGATCTCAAATCAGGTAGGATTACCCGCTGAACTTAAGCATATCAATAAGCGGAGGAA

>P\_F\_MT2-ITS-1

aacGGGTTCTATTCCcaaACCGTGTaTACATACCTTTGTTGCTTTGGCAGGCCGCCTTTTAGGCGTCGGCTTCGGCTGACTG  
CGCCTGCCAGAGGACCCAAACTCGTTTGTTAATGATGTCTGAGTACTATATAATAGTTAAACCTTTCAACAACGGATCTCT  
TGGTTCTGGCATCgATGAAGAACGCAGCGAAATGCGATAAgTAATGTGAATTGCAaAATTCAGTGAATCATCgAATCTTTGAA  
CgCaATTGCGCCCTTGGTATCCGAGGGGCATGcCTGTTCaAgcgtCATTATaACCACTCAAGCCTCgGCTTGGTCTTGgggtt  
CgCGGtCTCgCgtctTTAAATCagtGGCGGTGCCGtCTGGcTCTAAgCgTAgtAATTCTCtCgcTATAGGGtCCCGGcGGTTGCCT  
GCCagAACCCccCATTTTTTAcggtTGACCTCGgATcagGtAgGGATACcCGCTGAaCTTaagcatAtcAa

>P\_F\_MT3-ITS-1

aaaaaaTTCGGAaGGGGTTGTAGCTGGCCGAGGAAACGAGGCATGTGCACGCTCTTCTGTTTTTCATAACTACCTGTGCAC  
CTAATGTAgGATGCTCCTCTTTGGGAGGGGGGACCTATGCTTTGTATAACTCTTCGTGTAGAAAGTCTTAGAATGTTTAC  
TATCAGAGAGTCGCGACTTCTAGGAGACGCGAATCTTTGAGATAAAAGTTATTACAACCTTCAGCAATGGATCTCTTGGCTC  
TCGCATCGATGAAGAACGCGACGCAAAAGCGATATGTAATGTGAATTGCAGATCTACAGTGAATCATCGAATCTTTGAACGC  
ACCTTGCGCTCCTCGGTGTTCCGAGGAGCATGCCTGTTTGAGTGTCAAGTAAATTCTCAACCCCTCTTGATTTGTTTCGAGG  
GGGAGCTTGGATTGTGGGGGCTGCCGAGACTAGGACTCGTCTTGACTCGGGCTCTCCTTAAATGCATCGGCTTGGCG  
TCGACTTTTCGACTTTGCGCGACAAGGCTTTCCGGCGTGATAATGATCGCCGTTTCGCTGAAGCGCATGAATGAAGGTTCCGT  
GCCTCTAATTTCGCTGACTTAGTATCTCTCCGAGAGAAACGTCTTCTTATTGACTTTTACCTCAAATCAGGTAGGACTA  
CCCGCTGAACCTTAAGCATATCAATAAGCGGaggAaGaacaaTtAAcGAAAGATtatTCGGAGGGGTTGTAGCTGGCCGAGGAAAcg  
aaGGCaggtGccgcTCTTCTGTTTTTCaaactCACTGtGCACTAAAGtAGGagGCTCtCTTCGggaGGggGGAacTATGTcTTTGTAT  
AACTCTtctgTAaaagGtcTTAGA

>P\_F\_MT4-ITS-1

CTGGTTGGGTGTTGCTGGCTCTCCGGGGCATGTGCACACCTGACACCAACTTTTTACCACCTGTGCACCTTCTGTAGACC  
TGGATAAACTCTCGAGGAAACTCGTTTGAGGACTGCTGTGTGTAAGCCAGCTTTCCTTaTAACCTCCGGTCTATGTCTT  
TATATATACCCCTACAGTATGTCTAAGAATGTTTGTGTTGGGCTTCAATGCCTTTAACTTAATACAACCTTTCAACAACGGA  
TCTTTGGCTCTCGCATCGATGAAGAACGCGAGAAATGCGATAAGTAATGTGAATTGCAGAATTCAGTGAATCATCGAAT  
CTTTGAACTCACCTTGGCTCCTTGGTATTCCGAGGAGCATGCCTGTTTGAGTGTGCATGAAATTTCAACCTTTTCAGCTTT  
CTTTGTTGATCAGGCTTGGATGTGGGAGTATGCGGGCTTCTCAGAAGTCGGCTCTCCTGAAATGCATTAGCGGGACCTTTG  
TTGCCTGGCTTTGGTGTGATAATTATCTACGCCATTGTAGTCAAGCAGCTTaaAATGAGGTTTCagcTTCTAACcGTCTCCCC  
GAGACAACCTTTtGACAATTTGACCTCAAATCAGGTAGGACTACCCGCTGAACTTaaacATATcaataag

>O\_inoc\_MT3-ITS-1  
GGGGatCGGAgAAatCCGTTCCCTTCgaAGCCCTTTTtCaCCTCTTTCaCACCTGtGtGcACCCACGTTTCgCAAGGtCcTTCgGGACCT  
GCgCaTTCTATCTCgAAcTCgcAtGtctaCagAATGTCGCTagcATTTGAAATGAaATAcAACTTTcatCAaTGGATCTCTTGgctCtCgC  
ATCGATGAAGAAcgcagCGAAtCgcGATAAGTAATGtgaatTGcaGAtTTcCGTGAATCATCgAATCTTTGAACGCaCCTTGcgCTC  
CTTGgTatTCCGAGGAGCATGcctGtttGAgTGtcaTCgAAATCTCaaACTGAgcCTTTTTGAcTTTGGTCaAAGGctTGgGTTTTGgAc  
CGtTGGGAGTCTGCGGGTGACCCTCTCCGGGAcGtCgGCTCTCCTGAaATGcaTTAgcAgTGGgcaTGtGcaAgCCTTGcatGgcac  
CAgCCTCtCCgAcgcatAATGAtcgtCGTGggctGtaagCTGCaaaGGAtGTacCCCATGCTCcTAAAcCTGcgAgcCCTCCCAGGcTCT  
GCTTTcgAAGGcttGaCCTCaAATCAgTAGGACTACCCGCTGAaCTTaagCATATCAaTA

>P\_inoc\_MT1-ITS-1  
aaaCTTGAtcaGGTTGTTGCTGGCTCCCCTGAGCATGTGCACACTTGTCTATCTTTACTTTTCCCCAATGTGCACATATTGTAG  
GCCTGGAGCTCTTTTGATTATCTTGATAGATTGAGGACTGCTGTGCTTCAGCCAGCTTTTCTTGTTTCCAGGTCTATG  
TTTACCTTCACAAACTCTGAATATGTTTGAATGTTGAAATATAATATATATACAACCTTTCAGCAACGGATCTCTTGCTCT  
CGCATCGATGAAGAACGCAGCGAAATGCGATAAGTAATGTGAATTGCAGAATTCAGTGAATCATCGAATCTTTGAACGCAT  
CTTGCGCTCCTCTGGTATTCGAGGAGCATGCCTGTTTGAGTGTCTTAATCTCTCAACCACACCAATCTTTTGGCTTGGTG  
TGGCTTTTGGATGTGGGGGTTTTATTTTGGCTGGCTCCTATTAATGAGGTGAGCTCCCCTGAAACTTATTAGCGGTATCTGA  
GCAGAGAGACCTACTACAGGTGTGATAAATTATCTATGCCTTGGTCATACTGCATGAACAGATTGTGCTGCTTCCAGTGAAT  
CATTTGACAATTTTGACCTCacaTCaGtAgTatGACTACCCGCTGAaCTTaagcATATCAaTAAtc

>P\_inoc\_MT2-ITS-1  
cCCAaacTcttttAtTagTGAtGtctGAgTaCTATATAAtAcTtAaaActTcaACAAcggAtCTCTTGgtTCTGGcaTcgatgAacaacgcagcgaAatG  
caAtaAgTAATGtgAATTGCaTaatTcagTGAATCaTCaAATCTTTgAAcgcacaTTGCGCCcgcTggtatTCCgGCGGgcATGCcTgtccgA  
gcGtCattatGAccaAtcaagctctGcTTGgcCTTGgGgcCtGCTataCCGgCgGTCTTaAaAtCagtGgcggtGCCgtCtGtCTCTAatcgtAtt

>P\_inoc\_MT3-ITS-1  
cgGGTTCTATtCccaaaCCGTGTATACaTACCTTTGTTGCTTTGGcagGcCGCCTTTTAgGCGTCGGCTTCGGCTGACTGCGCCT  
GCCAGAgGACCaaAcTCgtTTGTTTAAATGATGTCTGAgTACTATATAATAgTAAAACTTTCAACAACGGATCTCTTGTTCTG  
GCATCGATGAAGAACGCAGCGAAATGCGATAAGTAATGTGAATTGCAGAATTCAGTGAATCATCGAATCTTTGAACGCACAT  
TGCGCCCCCTTGGTATTCCGAGGGGCATGcCtGtTCGAGCGTCATTATAACCACTCAAGCCTCGGCTTGGTCTTGGGGTTCgC  
GgtCTCgCGTCctTTaAAAtCagtGGCGGTGCCGTCTGGCTCTAAgCGTAgtAATTCTCTCgCTATAGGGTCCCGGCGGTGGCT  
GCCAgAACCCCCCATTTTTTACGGTTGACCTCGGATCAgGTAGGGATACCCgCTgAAcTTAAgCatAtCAATAAgcggAgG

>P\_inoc\_MT4-ITS-1  
aAaaaaaaTTCCGAGGGGTTGTAGCTGGCCGAGGAAACGAGGCATGTGCACGCTCTTCTGTTTTTCATAACTCACCTGTGC  
ACCTAATGTAGGATGCTCCTCTTTCCGGAGGGGGGACCTATGTCTTTGTATAACTCTTCGTGTAGAAAGTCTTGAAGATGTT  
ACTATCAGAGAGTCCGCACTTCTAGGAGACGCGAATCTTTGAGATAAAAGTTATTACAACCTTTCAGCAATGGATCTTTGGC  
TCTCGCATCGATGAAGAACGCAGCGAAAAGCGATATGTAATGTGAATTGCAGATCTACAGTGAATCATCGAATCTTTGAACGCACAT  
GCACCTTGCGCTCCTCGGTGTTCCGAGGAGCATGCCTGTTTGAGTGTCAAGTAATCTCAACCCCTCTTGATTTGTTTCGA  
GGGGGAGCTTGGATTGTGGGGGCTGCCGAGAGCTAGGACTCGTCTTGACTCGGGCTCTCCTTAAATGCATCGGCTTGC  
GGTGCATTTTCGACTTTGCCGACAAGGCTTTCCGCGTGATAATGATCGCGGTTTCGCTGAAGCGCATGAATGAAGGTTCC  
GTGCCTCTAATTTCGTGCACTTAGTATCTCTCCGAGAGAAAACGCTCTTCTTCAATTGACTTTTGACCTCAAATCAGGTAGGAC  
TACCCGCTGAaCTTAAGCATATCAATAAggcGGAAGGAaaaAaggg

>O\_non\_inoc\_MT3-ITS-1  
CCGCTGCTTGCaGCGGGCTGCGAAGGGAGAtATTATACACCCTGTACTTTGTTTACCTTTGTTGCTTTGGCGGGCCGTCGG  
TTTAGGCGTTGGCTCCGGCCGATCGTGCCCGCCAGAGGCCAAACTCTTTTATTAGTGATGTCTGAGTACTATATAATAG  
TTAAAACTTTCAACAACGGATCTCTTGTTCTGGCATCGATGAAGAACGCAGCGAAATGCGATAAGTAATGTGAATTGCAGA  
ATTCAAGTGAATCATCGAATCTTTGAACGCACATTGCGCCCGCTGGTATTCCGGCGGGCATGCCTGTCCGAGCGTCATTATG  
ACCAATCAAGCTCTGCTTGGCCTTGGGGCTGCTATACCGGCGGTCTTAAATCAGTGCGGTGCCGTCTGGCTCTAAG  
CGTAGTAATTCTCCTCGCTATAGAGCTCCAGACGTCCACCCGCCAGAACCCCAACTTTCTCAAGGTTGACCTCGGATCAG  
GTAGGGATACCCGCTGAaCTTAAGCATATCAATAAGCGGAGGAA

>P\_non\_inoc\_MT1-ITS-1  
aCTTGATcaGGTTGTTGCTGGCTCCCCTGAGCATGTGCACACTTGTCTATCTTTACTTTTCCCCAATGTGCACATATTGTAGGC  
CTGGAGCTCTTTTGATTATCTTGATAGATTGAGGACTGCTGTGCTTCAGCCAGCTTTTCTTGTTTCCAGGTCTATGTTT  
ACCTTCACAAACTCTGAATATGTTTGAATGTTGAAATATAATATATATACAACCTTTCAGCAACGGATCTCTTGCTCTCG  
CATCGATGAAGAACGCAGCGAAATGCGATAAGTAATGTGAATTGCAGAATTCAGTGAATCATCGAATCTTTGAACGCATCTT  
GCGCTCCTTGGTATTCCGAGGAGCATGCCTGTTTGAGTGTCTTAATCTCTCAACCACACCAATCTTTTGGCTTGGTGTG  
GCTTTTGGATGTGGGGGTTTTATTTTGGCTGGCTCCTATTAATGAGGTGAGCTCCCCTGAAACTTATTAGCGGTATCTGAGC  
AGAGAGACCTACTACAGGTGTGATAAATTATCTATGCCTTGGTCATACTGCATGAACAGATTGTGCTGCTTCCAGTGAATCA  
TTTGACAATTTTGACCTCAAATCAGGTAGGACTACCCGCTGAaCTTAAGCATATCAATAAGCGGAGGAA

**Figure S3.** ITS sequences for mycorrhizae fungus identification.

**Table S4.** ECM fungus identification by sequencing. For morphotypes with grey cells sequence analysis was not successful.

| Morphotype     | Length (bp) | Closest match, UNITE (parameters) |                               |              |            | Closest match, NCBI (parameters) |                                |                |             |            |
|----------------|-------------|-----------------------------------|-------------------------------|--------------|------------|----------------------------------|--------------------------------|----------------|-------------|------------|
|                |             | Acc. #                            | UNITE name                    | Score (bits) | Identity % | Acc. #                           | Name                           | Query cover, % | Total score | Identity % |
| B_F_MT1        | 642         | UDB011464                         | <i>Lactarius mammosus</i>     | 1104         | 100        | KJ705202                         | <i>Lactarius mammosus</i>      | 97             | 1164        | 100        |
| B_F_MT2        | 502         | FN669230                          | <i>Meliniomyces bicolor</i>   | 883          | 99         | FN669230                         | <i>Meliniomyces</i> sp.        | 100            | 900         | 99         |
| B_F_MT3        | 638         | UDB025177                         | <i>Inocybe lacera</i>         | 1088         | 100        | HQ604443                         | <i>Inocybe lacera</i>          | 100            | 1157        | 99.4       |
| B_non_inoc_MT1 |             |                                   |                               |              |            |                                  |                                |                |             |            |
| B_non_inoc_MT2 |             |                                   |                               |              |            |                                  |                                |                |             |            |
| B_non_inoc_MT3 |             |                                   |                               |              |            |                                  |                                |                |             |            |
| B_non_inoc_MT4 |             |                                   |                               |              |            |                                  |                                |                |             |            |
| B_non_inoc_MT5 |             |                                   |                               |              |            |                                  |                                |                |             |            |
| B_inoc_MT1     |             |                                   |                               |              |            |                                  |                                |                |             |            |
| B_inoc_MT2     |             |                                   |                               |              |            |                                  |                                |                |             |            |
| B_inoc_MT3     |             |                                   |                               |              |            |                                  |                                |                |             |            |
| O_F_MT1        | 492         | UDB002586                         | <i>Meliniomyces bicolor</i>   | 874          | 99         | KU176262                         | Uncultured <i>Meliniomyces</i> | 98             | 865         | 99         |
| O_F_MT2        |             |                                   |                               |              |            |                                  |                                |                |             |            |
| O_F_MT3        | 446         | UDB026053                         | <i>Meliniomyces</i>           | 735          | 99         | KY684476                         | Uncultured <i>Meliniomyces</i> | 99             | 800         | 99.1       |
| O_F_MT4        | 479         | UDB0799592                        | <i>Cortinarius bivelus</i>    | 613          | 100        | MK234571                         | <i>Cortinarius bivelus</i>     | 100            | 883         | 100        |
| O_non_inoc_MT1 |             |                                   |                               |              |            |                                  |                                |                |             |            |
| O_non_inoc_MT2 |             |                                   |                               |              |            |                                  |                                |                |             |            |
| O_non_inoc_MT3 | 530         | UDB028259                         | <i>Meliniomyces</i>           | 760          | 97         | KT334710                         | Uncultured fungus              | 100            | 979         | 100        |
| O_inoc_MT1     |             |                                   |                               |              |            |                                  |                                |                |             |            |
| O_inoc_MT2     |             |                                   |                               |              |            |                                  |                                |                |             |            |
| O_inoc_MT3     | 595         | UDB07672649                       | <i>Pisolithus arhizus</i>     | 1018         | 100        | FR748134                         | <i>Pisolithus capsulifer</i>   | 100            | 1094        | 99.8       |
| P_F_MT1        | 632         | UDB016490                         | <i>Tomentella ellisii</i>     | 1066         | 100        | MZ773239                         | <i>Tomentella ellisii</i>      | 100            | 136         | 100        |
| P_F_MT2        | 492         | FN679031                          | <i>Meliniomyces bicolor</i>   | 854          | 99         | KF428297                         | <i>Helotiaceae</i> sp.         | 100            | 876         | 98.8       |
| P_F_MT3        | 848         | UDB027685                         | <i>Rhizopogon mohelnensis</i> | 1223         | 99         | JX898967                         | Uncultured <i>Rhizopogon</i>   | 99             | 1549        | 99.7       |
| P_F_MT4        | 644         | UDB019593                         | <i>Tricholoma argyraceum</i>  | 1157         | 100        | MG367247                         | <i>Tricholoma argyraceum</i>   | 100            | 1179        | 99.7       |
| P_non_inoc_MT1 | 645         | UDB025177                         | <i>Inocybe lacera</i>         | 1103         | 100        | AB669659                         | Uncultured mycorrhizal fungus  | 100            | 1177        | 99.5       |
| P_non_inoc_MT2 |             |                                   |                               |              |            |                                  |                                |                |             |            |
| P_non_inoc_MT3 |             |                                   |                               |              |            |                                  |                                |                |             |            |
| P_non_inoc_MT4 |             |                                   |                               |              |            |                                  |                                |                |             |            |

| Morphotype  | Length (bp) | Closest match, UNITE (parameters) |                               |              |            | Closest match, NCBI (parameters) |                                              |                |             |            |
|-------------|-------------|-----------------------------------|-------------------------------|--------------|------------|----------------------------------|----------------------------------------------|----------------|-------------|------------|
|             |             | Acc. #                            | UNITE name                    | Score (bits) | Identity % | Acc. #                           | Name                                         | Query cover, % | Total score | Identity % |
| P_in oc_MT1 | 640         | UDB025177                         | <i>Inocybe lacera</i>         | 1081         | 100        | FM992932                         | Uncultured ectomycorrhiza ( <i>Inocybe</i> ) | 98             | 1158        | 99.7       |
| P_in oc_MT2 | 291         | UDB028259                         | <i>Meliniomyces</i>           | 441          | 97         | AB986370                         | <i>Hyaloscypha ceae</i> sp.                  | 99             | 501         | 97.9       |
| P_in oc_MT3 | 500         | UDB017362                         | <i>Meliniomyces bicolor</i>   | 897          | 99         | JX507662                         | <i>Helotiales</i> sp.                        | 99             | 905         | 99.4       |
| P_in oc_MT4 | 695         | UDB025458                         | <i>Rhizopogon mohelnensis</i> | 1216         | 99         | HG426016                         | Uncultured <i>Rhizopogon</i>                 | 97             | 1242        | 99.7       |

**Table S5.** One-Way ANOVA, Kruskal-Wallis and post hoc tests for significance of differences between variants of the experiment in diversity indices of ECM communities.

|                         | ANOVA     |                |    |             |       |       | Post Hoc comparison |                    |        |       |        |       |
|-------------------------|-----------|----------------|----|-------------|-------|-------|---------------------|--------------------|--------|-------|--------|-------|
|                         |           | Sum of Squares | df | Mean Square | F     | p     |                     |                    | Mean   | SE    | t      | p     |
| Simpson dominance index | variant   | 0.053          | 2  | 0.027       | 0.940 | 0.441 | field birch         | pot birch inoc     | -0.067 | 0.146 | -0.464 | 0.890 |
|                         | Residuals | 0.169          | 6  | 0.028       |       |       |                     | pot birch non-inoc | 0.131  | 0.128 | 1.020  | 0.593 |
|                         |           |                |    |             |       |       | pot birch inoc      | pot birch non-inoc | 0.198  | 0.153 | 1.293  | 0.449 |
|                         | variant   | 0.120          | 2  | 0.060       | 2.245 | 0.176 | field oak           | pot oak inoc       | 0.153  | 0.119 | 1.286  | 0.446 |
|                         | Residuals | 0.187          | 7  | 0.027       |       |       |                     | pot oak non-inoc   | 0.275  | 0.137 | 2.013  | 0.179 |
|                         |           |                |    |             |       |       | pot oak inoc        | pot oak non-inoc   | 0.122  | 0.149 | 0.816  | 0.706 |
|                         | variant   | 0.013          | 2  | 0.006       | 0.340 | 0.722 | field pine          | pot pine inoc      | 0.065  | 0.099 | 0.657  | 0.794 |
|                         | Residuals | 0.148          | 8  | 0.019       |       |       |                     | pot pine non-inoc  | -0.021 | 0.099 | -0.215 | 0.975 |
|                         |           |                |    |             |       |       | pot pine inoc       | pot pine non-inoc  | -0.087 | 0.111 | -0.780 | 0.725 |
| Gini-Simpson index      | variant   | 0.053          | 2  | 0.027       | 0.940 | 0.441 | field birch         | pot birch inoc     | 0.068  | 0.146 | 0.464  | 0.890 |
|                         | Residuals | 0.169          | 6  | 0.028       |       |       |                     | pot birch non-inoc | -0.131 | 0.128 | -1.020 | 0.593 |
|                         |           |                |    |             |       |       | pot birch inoc      | pot birch non-inoc | -0.198 | 0.153 | -1.293 | 0.449 |
|                         | variant   | 0.120          | 2  | 0.060       | 2.245 | 0.176 | field oak           | pot oak inoc       | -0.153 | 0.119 | -1.286 | 0.446 |
|                         | Residuals | 0.187          | 7  | 0.027       |       |       |                     | pot oak non-inoc   | -0.275 | 0.137 | -2.013 | 0.179 |
|                         |           |                |    |             |       |       | pot oak inoc        | pot oak non-inoc   | -0.122 | 0.149 | -0.816 | 0.706 |
|                         | variant   | 0.013          | 2  | 0.006       | 0.340 | 0.722 | field pine          | pot pine inoc      | -0.065 | 0.099 | -0.657 | 0.794 |
|                         | Residuals | 0.148          | 8  | 0.019       |       |       |                     | pot pine non-inoc  | 0.021  | 0.099 | 0.215  | 0.975 |
|                         |           |                |    |             |       |       | pot pine inoc       | pot pine non-inoc  | 0.087  | 0.111 | 0.780  | 0.725 |

|                         |           |       |   |       |       |       |                |                    |        |       |        |       |
|-------------------------|-----------|-------|---|-------|-------|-------|----------------|--------------------|--------|-------|--------|-------|
| Shannon diversity index | variant   | 0.168 | 2 | 0.084 | 1.208 | 0.362 | field birch    | pot birch inoc     | 0.082  | 0.228 | 0.362  | 0.931 |
|                         | Residuals | 0.417 | 6 | 0.069 |       |       |                | pot birch non-inoc | -0.254 | 0.201 | -1.263 | 0.463 |
|                         |           |       |   |       |       |       | pot birch inoc | pot birch non-inoc | -0.337 | 0.241 | -1.400 | 0.399 |
|                         | Variant   | 0.340 | 2 | 0.170 | 2.650 | 0.139 | field oak      | pot oak inoc       | -0.227 | 0.185 | -1.226 | 0.476 |
|                         | Residuals | 0.449 | 7 | 0.064 |       |       |                | pot oak non-inoc   | -0.475 | 0.212 | -2.242 | 0.131 |
|                         |           |       |   |       |       |       | pot oak inoc   | pot oak non-inoc   | -0.248 | 0.231 | -1.074 | 0.558 |
|                         | Variant   | 0.025 | 2 | 0.013 | 0.271 | 0.770 | field pine     | pot pine inoc      | -0.114 | 0.158 | -0.721 | 0.758 |
|                         | Residuals | 0.375 | 8 | 0.047 |       |       |                | pot pine non-inoc  | -0.064 | 0.158 | -0.405 | 0.915 |
|                         |           |       |   |       |       |       | pot pine inoc  | pot pine non-inoc  | 0.050  | 0.177 | 0.283  | 0.957 |
| Berger-Parker index     | Variant   | 0.036 | 2 | 0.018 | 0.683 | 0.540 | field birch    | pot birch inoc     | -0.027 | 0.140 | -0.197 | 0.979 |
|                         | Residuals | 0.157 | 6 | 0.026 |       |       |                | pot birch non-inoc | 0.122  | 0.123 | 0.993  | 0.608 |
|                         |           |       |   |       |       |       | pot birch inoc | pot birch non-inoc | 0.150  | 0.148 | 1.017  | 0.594 |
|                         | Variant   | 0.086 | 2 | 0.043 | 1.278 | 0.337 | field oak      | pot oak inoc       | 0.131  | 0.134 | 0.978  | 0.612 |
|                         | Residuals | 0.237 | 7 | 0.034 |       |       |                | pot oak non-inoc   | 0.233  | 0.154 | 1.515  | 0.341 |
|                         |           |       |   |       |       |       | pot oak inoc   | pot oak non-inoc   | 0.102  | 0.168 | 0.606  | 0.822 |
|                         | Variant   | 0.023 | 2 | 0.012 | 0.476 | 0.638 | field pine     | pot pine inoc      | 0.086  | 0.115 | 0.750  | 0.742 |
|                         | Residuals | 0.197 | 8 | 0.025 |       |       |                | pot pine non-inoc  | -0.034 | 0.115 | -0.297 | 0.953 |
|                         |           |       |   |       |       |       | pot pine inoc  | pot pine non-inoc  | -0.120 | 0.128 | -0.936 | 0.634 |

Asterisks represent significant p values (< 0.05). SE: standard error.

**Table S6.** Indices of similarity between ECM communities determined for trees within variants of the experiment.

| Index                      | Estimate | Standard error | 95%Lower | 95%Upper |
|----------------------------|----------|----------------|----------|----------|
| field birches              |          |                |          |          |
| Sorensen                   | 0.970    | 0.017          | 0.936    | 1.000    |
| Jaccard                    | 0.889    | 0.052          | 0.786    | 0.991    |
| Bray-Curtis                | 1.000    | 0.000          | 1.000    | 1.000    |
| non-inoculated pot birches |          |                |          |          |
| Sorensen                   | 0.875    | 0.050          | 0.777    | 0.973    |
| Jaccard                    | 0.700    | 0.087          | 0.529    | 0.871    |
| Bray-Curtis                | 0.930    | 0.057          | 0.819    | 1.000    |
| inoculated pot birches     |          |                |          |          |
| Sorensen                   | 0.924    | 0.151          | 0.628    | 1.220    |
| Jaccard                    | 0.858    | 0.214          | 0.440    | 1.277    |
| Bray-Curtis                | 1.000    | 0.162          | 0.682    | 1.000    |
| field oaks                 |          |                |          |          |
| Sorensen                   | 0.833    | 0.035          | 0.765    | 0.902    |
| Jaccard                    | 0.500    | 0.077          | 0.350    | 0.650    |
| Bray-Curtis                | 0.907    | 0.047          | 0.816    | 0.999    |
| non-inoculated pot oaks    |          |                |          |          |
| Sorensen                   | 1.000    | 0.000          | 1.000    | 1.000    |
| Jaccard                    | 1.000    | 0.000          | 1.000    | 1.000    |
| Bray-Curtis                | 1.000    | 0.000          | 1.000    | 1.000    |
| inoculated pot oaks        |          |                |          |          |



|                          |       |       |       |       |
|--------------------------|-------|-------|-------|-------|
| Sorensen                 | 0.938 | 0.008 | 0.922 | 0.953 |
| Jaccard                  | 0.833 | 0.017 | 0.800 | 0.866 |
| Bray-Curtis              | 1.000 | 0.005 | 0.990 | 1.000 |
| field pines              |       |       |       |       |
| Sorensen                 | 0.833 | 0.000 | 0.833 | 0.833 |
| Jaccard                  | 0.500 | 0.000 | 0.500 | 0.500 |
| Bray-Curtis              | 0.954 | 0.011 | 0.932 | 0.975 |
| non-inoculated pot pines |       |       |       |       |
| Sorensen                 | 0.955 | 0.017 | 0.922 | 0.987 |
| Jaccard                  | 0.875 | 0.039 | 0.798 | 0.952 |
| Bray-Curtis              | 1.000 | 0.030 | 0.942 | 1.000 |
| inoculated pot pines     |       |       |       |       |
| Sorensen                 | 0.833 | 0.042 | 0.752 | 0.915 |
| Jaccard                  | 0.625 | 0.078 | 0.473 | 0.777 |
| Bray-Curtis              | 0.852 | 0.074 | 0.706 | 0.997 |

**Table S7.** Kruskal-Wallis test and post hoc test output for significance of differences between variants of the experiment in relative abundance of exploration types of mycorrhiza.

| Explora-<br>tion type | Kruskal-Wallis       |                     |                 | Post Hoc comparisons |                       |                      |               |                 |                      |
|-----------------------|----------------------|---------------------|-----------------|----------------------|-----------------------|----------------------|---------------|-----------------|----------------------|
|                       | Statistic            | d<br>f              | p               | Comparisons          |                       | Mean                 | SE            | t               | p bonf               |
| Contact               | 31.095               | 2                   | 1.770e -7       | birch field          | birch pot<br>inoc     | -31.899              | 5.39<br>1     | -5.917          | 7.581e<br>-8*        |
|                       |                      |                     |                 |                      | birch pot<br>non-inoc | -13.786              | 4.63<br>6     | -2.974          | 0.010*               |
|                       |                      |                     |                 | birch pot inoc       | birch pot<br>non-inoc | 18.113               | 4.76<br>7     | 3.800           | 6.523e<br>-4*        |
|                       |                      |                     |                 |                      | oak field             | oak pot<br>inoc      | -18.687       | 5.11<br>7       | -3.652               |
|                       | oak pot inoc         | oak pot<br>non-inoc | -20.625         | 5.53<br>2            |                       | -3.728               | 9.337e<br>-4* |                 |                      |
|                       |                      | 37.596              | 2               | 6.856e -9            | oak pot inoc          | oak pot<br>non-inoc  | -1.938        | 5.11<br>7       | -0.379               |
|                       | pine field           |                     |                 |                      |                       | pine pot<br>inoc     | -0.357        | 3.10<br>7       | -0.115               |
|                       |                      |                     |                 |                      | pine pot inoc         | pine pot<br>non-inoc | -6.935        | 2.89<br>2       | -2.398               |
|                       | 8.054                |                     |                 |                      |                       | 2                    | 0.018         | pine pot inoc   | pine pot<br>non-inoc |
|                       |                      | oak field           | oak pot<br>inoc | -7.559               | 3.42<br>2             |                      |               |                 | -2.209               |
|                       |                      |                     | oak pot inoc    | oak pot<br>non-inoc  | -1.409                |                      |               | 3.69<br>9       | -0.381               |
|                       |                      | 48.719              |                 | 2                    | 2.635e -11            |                      |               | pine field      | pine pot<br>inoc     |
| pine pot<br>non-inoc  | 16.468               |                     | 3.51<br>5       |                      |                       | 4.685                | 2.267e<br>-5* |                 |                      |
| pine pot inoc         | pine pot<br>non-inoc |                     | 16.952          |                      |                       | 3.15<br>3            | 5.376         | 1.167e<br>-6*   |                      |
|                       | 55.259               |                     | 2               |                      |                       | 1.001e -12           | oak field     | oak pot<br>inoc | 2.537                |
| oak pot<br>non-inoc   |                      | -12.325             |                 | 2.98<br>4            | -4.131                |                      |               | 2.171e<br>-4*   |                      |
| oak pot inoc          |                      | oak pot<br>non-inoc |                 | -14.863              | 2.76<br>0             |                      | -5.385        | 1.315e<br>-6*   |                      |

| Exploration type     | Kruskal-Wallis |     |           | Post Hoc comparisons |                   |           |       |           |                  |
|----------------------|----------------|-----|-----------|----------------------|-------------------|-----------|-------|-----------|------------------|
|                      | Statistic      | d f | p         | Comparisons          |                   | Mean      | SE    | t         | p bonf           |
|                      |                |     |           |                      |                   |           |       |           |                  |
|                      | 10.619         | 2   | 0.005     | pine field           | pine pot inoc     | 0.459     | 0.166 | 2.763     | <b>0.020*</b>    |
|                      |                |     |           |                      | pine pot non-inoc | 0.459     | 0.155 | 2.969     | <b>0.011*</b>    |
|                      |                |     |           | pine pot inoc        | pine pot non-inoc | 7.772e-16 | 0.139 | 5.600e-15 | 1.000            |
| <i>Long distance</i> | 43.881         | 2   | 2.961e-10 | pine field           | pine pot inoc     | 0.996     | 4.116 | 0.242     | 1.000            |
|                      |                |     |           |                      | pine pot non-inoc | -19.863   | 3.831 | -5.184    | <b>2.727e-6*</b> |
|                      |                |     |           | pine pot inoc        | pine pot non-inoc | -20.859   | 3.437 | -6.069    | <b>4.811e-8*</b> |

Asterisks represent significant p values (< 0.05). SE: standard error.

**Table S8.** Correlation coefficients between soil characteristics and exploration types of mycorrhizae.

| Soil characteristics | Contact exploration type | Short-distance exploration type | Medium-distance exploration type | Long-distance exploration type |
|----------------------|--------------------------|---------------------------------|----------------------------------|--------------------------------|
| Al                   | 0.27                     | -0.33                           | 0.03                             | 0.12                           |
| Co                   | 0.00                     | -0.07                           | -0.17                            | 0.29                           |
| Cu                   | 0.12                     | -0.08                           | -0.38                            | 0.20                           |
| Fe                   | 0.35                     | -0.13                           | -0.30                            | -0.17                          |
| Mn                   | -0.33                    | 0.31                            | -0.08                            | 0.08                           |
| Ni                   | -0.36                    | 0.38                            | -0.10                            | -0.03                          |
| Pb                   | -0.31                    | 0.20                            | 0.06                             | 0.10                           |
| Sr                   | -0.36                    | 0.35                            | -0.08                            | -0.02                          |
| Zn                   | 0.03                     | -0.29                           | 0.07                             | 0.35                           |
| Cs                   | 0.01                     | -0.25                           | <b>0.40*</b>                     | -0.03                          |
| U                    | -0.09                    | 0.26                            | -0.25                            | 0.01                           |
| TC                   | -0.33                    | <b>0.52*</b>                    | -0.11                            | -0.31                          |
| TN                   | <b>-0.40*</b>            | <b>0.52*</b>                    | -0.04                            | -0.20                          |
| C/N                  | -0.27                    | <b>0.49*</b>                    | -0.13                            | -0.34                          |
| TP                   | 0.38                     | -0.14                           | -0.03                            | -0.27                          |
| pH                   | 0.18                     | -0.26                           | -0.13                            | 0.25                           |

Asterisks and bold print represent significant correlation ( $p < 0.05$ ).

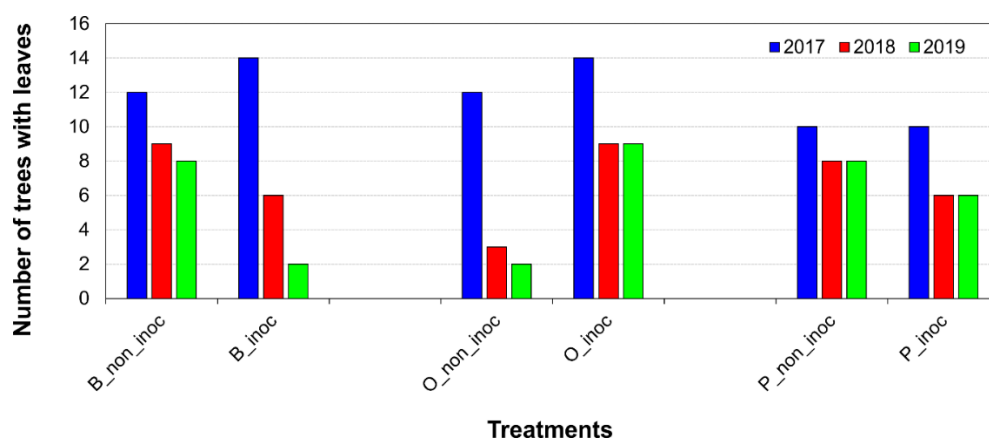

**Figure S4.** Plant growth during pot experiment. B – birch, O – oak, P – pine; non\_inoc – non-inoculated variant of the experiment, inoc – inoculated variant of the experiment.

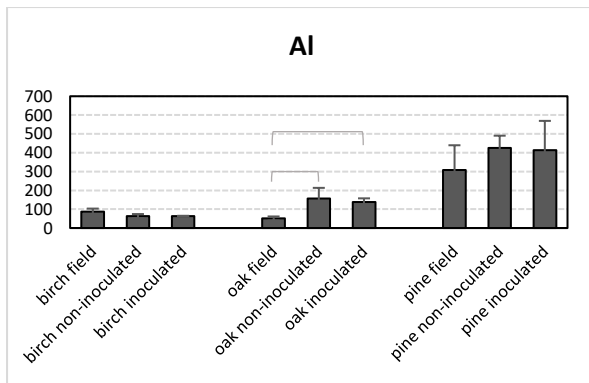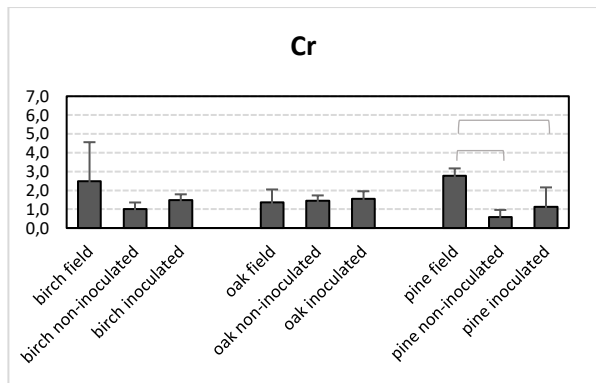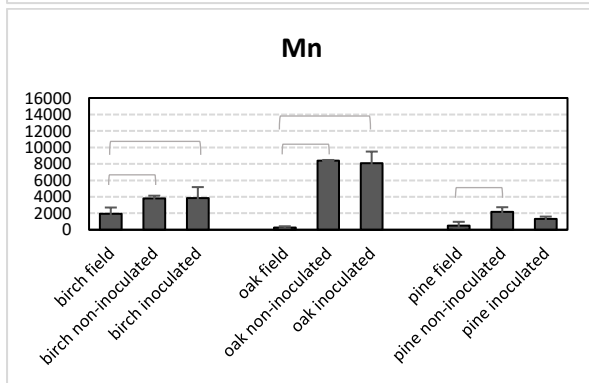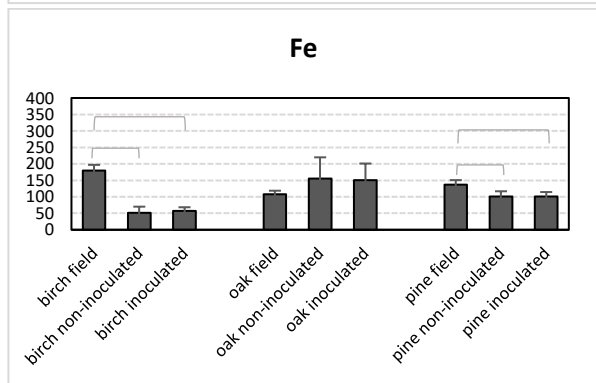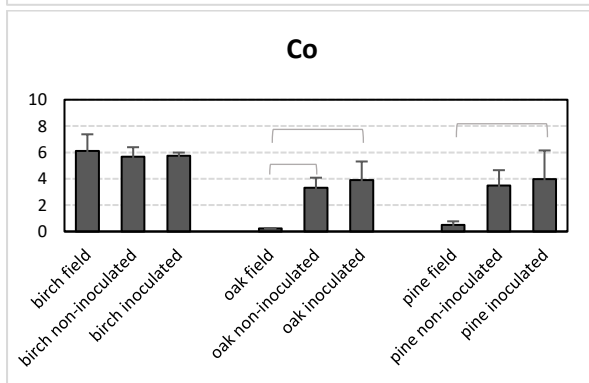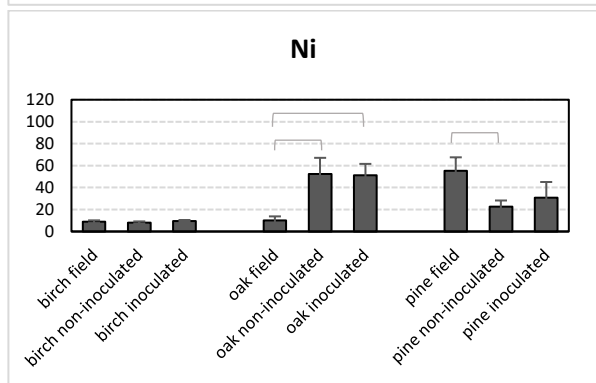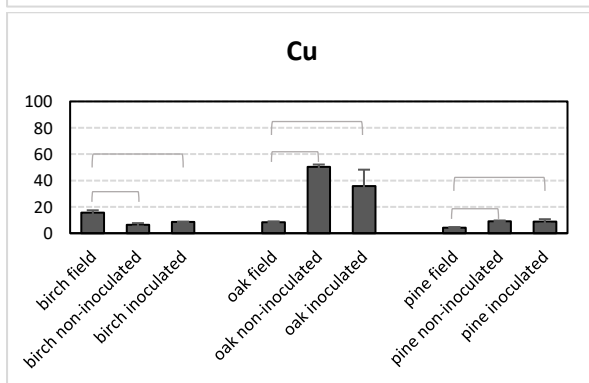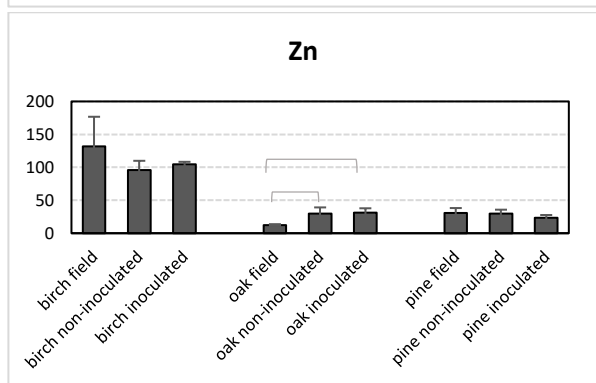

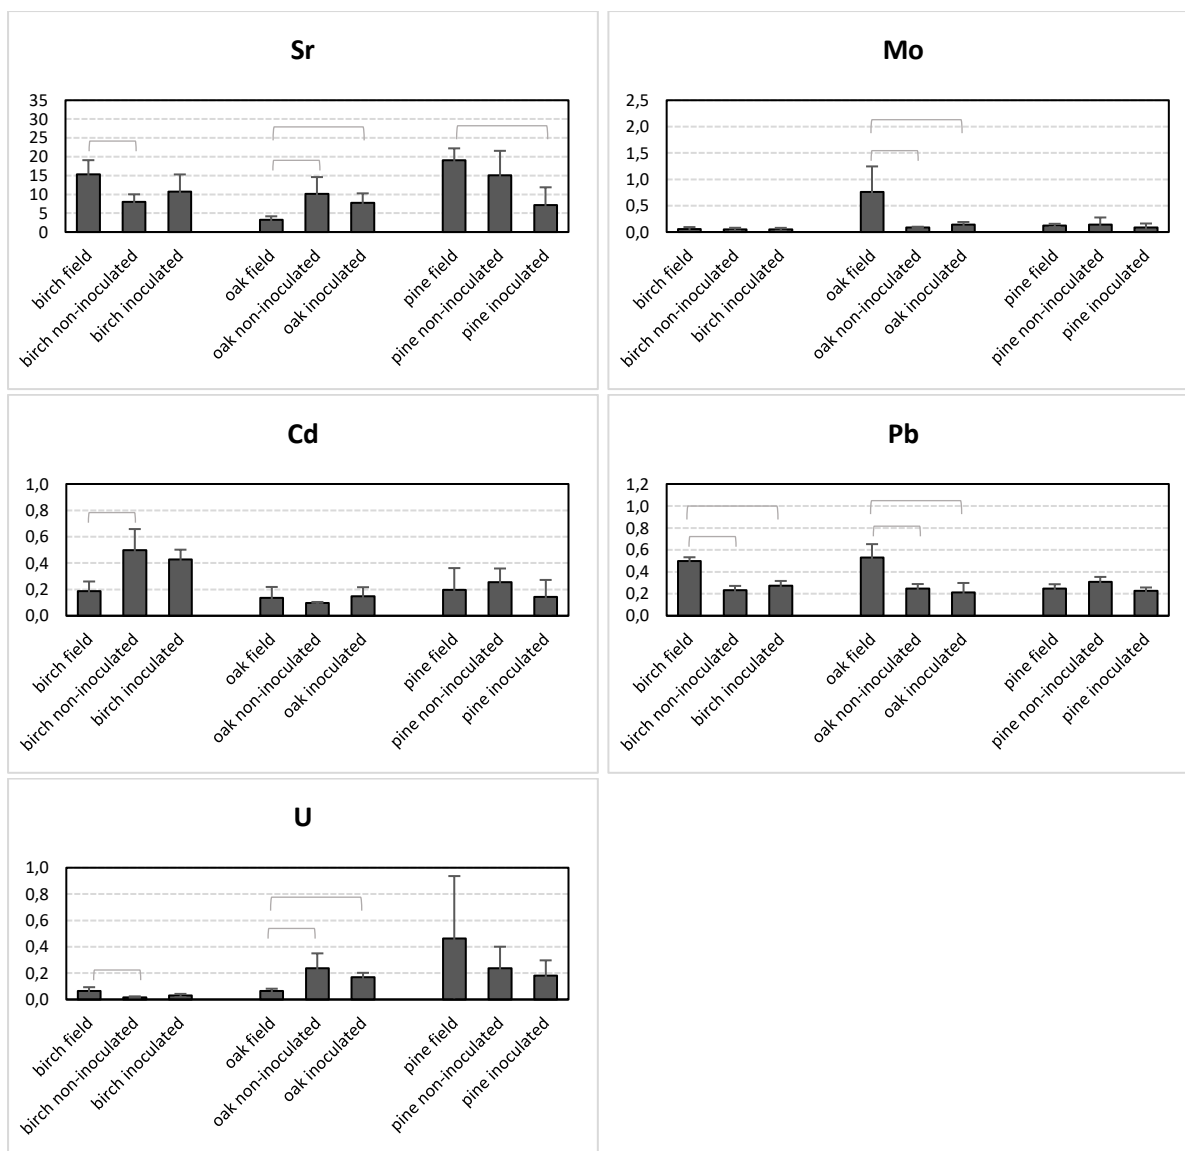

**Figure S5.** Content of toxic metals measured in aboveground dried plant biomass in variants of the experiment. y-axis represents concentration in  $\mu\text{g/g}$ . Brackets represent significant differences ( $p < 0.05$ ).
